# Supplementary material for: Selenoprotein Gpx3 knockdown induces myocardial damage through Ca2+ leaks in chickens
Source: Royal Society of Chemistry journal article supplement (doi:10.1039/d0mt00027b), 2020-09-02
Supplement: d0mt00027b2.pdf [file d0mt00027b2.pdf]

**Table S2 The antibodies used in the present study**

| Antibody name  | Dilution ratio |
|----------------|----------------|
| Gpx3           | 1:500          |
| CASR           | 1:1000         |
| ORAI1          | 1:1000         |
| SERCA          | 1:500          |
| CALM           | 1:1000         |
| PMCA           | 1:1000         |
| NCX            | 1:1500         |
| XBPI           | 1:500          |
| LAMP           | 1:1000         |
| GRP78          | 1:500          |
| CHOP           | 1:500          |
| ATF4           | 1:1000         |
| COX-2          | 1:500          |
| HO-1           | 1:1000         |
| iNOS           | 1:1000         |
| NF- $\kappa$ B | 1:500          |
| PTGEs          | 1:500          |
| TNF- $\alpha$  | 1:500          |
| HSP60          | 1:500          |
| HSP70          | 1:500          |
| HSP90          | 1:500          |
| MYL2           | 1:500          |
| MYL3           | 1:500          |
| TNNC1          | 1:1000         |
| TNNT2          | 1:1000         |
| GAPDH          | 1:1500         |
