# Supplementary material for: Selenoprotein Gpx3 knockdown induces myocardial damage through Ca2+ leaks in chickens
Source: Royal Society of Chemistry journal article supplement (doi:10.1039/d0mt00027b), 2020-09-02
Supplement: d0mt00027b3.pdf [file d0mt00027b3.pdf]

Table S3. Effects of Gpx3 knockdown on mRNA levels in cardiomyocytes

|                              | C             | KD             |
|------------------------------|---------------|----------------|
| Gpx3                         | 1.013 ± 0.021 | 0.402 ± 0.030* |
| calcium channel              |               |                |
| ORAI1                        | 1.076 ± 0.071 | 0.074 ± 0.002* |
| TRPC1                        | 1.076 ± 0.071 | 0.230 ± 0.034* |
| TRPC3                        | 1.076 ± 0.071 | 0.245 ± 0.024* |
| CACNA1S                      | 1.076 ± 0.071 | 0.103 ± 0.025* |
| STIM1                        | 1.076 ± 0.071 | 0.268 ± 0.077* |
| PMCA1                        | 1.076 ± 0.071 | 0.119 ± 0.008* |
| NCX                          | 1.076 ± 0.071 | 0.316 ± 0.032* |
| SERCA                        | 1.076 ± 0.071 | 0.284 ± 0.020* |
| CALM                         | 1.076 ± 0.071 | 0.152 ± 0.023* |
| TRP1                         | 1.076 ± 0.071 | 2.831 ± 0.354* |
| TRP2                         | 1.076 ± 0.071 | 0.428 ± 0.120* |
| TRP3                         | 1.076 ± 0.071 | 1.200 ± 0.140  |
| RyR1                         | 1.076 ± 0.071 | 0.194 ± 0.003* |
| RyR2                         | 1.076 ± 0.071 | 0.432 ± 0.125* |
| RyR3                         | 1.076 ± 0.071 | 1.332 ± 0.029* |
| CASR                         | 1.076 ± 0.071 | 0.614 ± 0.045* |
| endoplasmic reticulum stress |               |                |
| XBP1                         | 1.076 ± 0.071 | 1.495 ± 0.131* |
| LAMP                         | 1.076 ± 0.071 | 2.341 ± 0.066* |
| GRP78                        | 1.076 ± 0.071 | 4.607 ± 0.425* |
| GRP94                        | 1.076 ± 0.071 | 2.017 ± 0.346* |
| CHOP                         | 1.076 ± 0.071 | 1.299 ± 0.059* |
| ATF4                         | 1.076 ± 0.071 | 2.197 ± 0.227* |
| ATF6                         | 1.076 ± 0.071 | 1.311 ± 0.009* |
| inflammation                 |               |                |
| COX-2                        | 1.076 ± 0.071 | 1.903 ± 0.102* |
| HO-1                         | 1.076 ± 0.071 | 0.861 ± 0.006* |
| iNOS                         | 1.076 ± 0.071 | 4.977 ± 0.315* |
| NF-κB                        | 1.076 ± 0.071 | 4.888 ± 0.502* |
| PTGES                        | 1.076 ± 0.071 | 6.089 ± 0.473* |
| TNF-α                        | 1.076 ± 0.071 | 3.323 ± 0.102* |
| heat shock proteins          |               |                |
| HSP27                        | 1.076 ± 0.071 | 2.007 ± 0.132* |
| HSP40                        | 1.076 ± 0.071 | 1.250 ± 0.133* |
| HSP60                        | 1.076 ± 0.071 | 1.308 ± 0.050* |
| HSP70                        | 1.076 ± 0.071 | 1.425 ± 0.130* |
| HSP90                        | 1.076 ± 0.071 | 1.293 ± 0.045* |
| myocardial contraction       |               |                |
| MYL2                         | 1.076 ± 0.071 | 0.211 ± 0.040* |
| MYL3                         | 1.076 ± 0.071 | 0.193 ± 0.012* |

|       |               |                |
|-------|---------------|----------------|
| TNNT2 | 1.076 ± 0.071 | 0.143 ± 0.104* |
| TNNC1 | 1.076 ± 0.071 | 0.161 ± 0.020* |
| MYH11 | 1.076 ± 0.071 | 0.979 ± 0.102* |
| MYH15 | 1.076 ± 0.071 | 0.734 ± 0.076* |

---

Values are the mean ± SD (n = 3). \* Indicates significant difference from the corresponding normal ( $P < 0.05$ ). C indicates the control group, KD indicates the knockdown group in vitro.

Effects of Gpx3 knockdown on mRNA levels in chicken embryos

|                                     | 6 days      |              | 8 days      |              | 10 days     |              |
|-------------------------------------|-------------|--------------|-------------|--------------|-------------|--------------|
|                                     | Normal-6    | siRNA-6      | Normal-8    | siRNA-8      | Normal-10   | siRNA-10     |
| Gpx3                                | 1.013±0.106 | 0.882±0.015* | 0.972±0.036 | 0.770±0.017* | 1.032±0.168 | 0.463±0.012* |
| <b>calcium channel</b>              |             |              |             |              |             |              |
| ORAI1                               | 1.013±0.106 | 0.877±0.021  | 0.972±0.036 | 0.774±0.012* | 1.032±0.168 | 0.657±0.001* |
| TRPC1                               | 1.013±0.106 | 0.885±0.013  | 0.972±0.036 | 0.791±0.006* | 1.032±0.168 | 0.674±0.016* |
| TRPC3                               | 1.013±0.106 | 0.909±0.017  | 0.972±0.036 | 0.795±0.006* | 1.032±0.168 | 0.653±0.007* |
| CACNA1S                             | 1.013±0.106 | 0.892±0.012  | 0.972±0.036 | 0.777±0.019* | 1.032±0.168 | 0.577±0.010* |
| STIM1                               | 1.013±0.106 | 0.983±0.020  | 0.972±0.036 | 0.781±0.005* | 1.032±0.168 | 0.581±0.005* |
| PMCA1                               | 1.013±0.106 | 0.978±0.009  | 0.972±0.036 | 0.873±0.012* | 1.032±0.168 | 0.756±0.010* |
| CASR                                | 1.013±0.106 | 0.983±0.004  | 0.972±0.036 | 0.858±0.006* | 1.032±0.168 | 0.598±0.022* |
| SERCA                               | 1.013±0.106 | 0.985±0.006  | 0.972±0.036 | 0.865±0.004* | 1.032±0.168 | 0.692±0.006* |
| CALM                                | 1.013±0.106 | 0.982±0.005  | 0.972±0.036 | 0.872±0.007* | 1.032±0.168 | 0.774±0.012* |
| TRP1                                | 1.013±0.106 | 1.089±0.059  | 0.972±0.036 | 1.244±0.010* | 1.032±0.168 | 1.441±0.011* |
| TRP2                                | 1.013±0.106 | 0.975±0.016  | 0.972±0.036 | 0.866±0.018* | 1.032±0.168 | 0.692±0.007* |
| TRP3                                | 1.013±0.106 | 1.077±0.067  | 0.972±0.036 | 1.235±0.007* | 1.032±0.168 | 1.282±0.025* |
| RyR1                                | 1.013±0.106 | 0.973±0.016  | 0.972±0.036 | 0.881±0.015* | 1.032±0.168 | 0.795±0.007* |
| RyR2                                | 1.013±0.106 | 0.898±0.001  | 0.972±0.036 | 0.779±0.001* | 1.032±0.168 | 0.692±0.006* |
| RyR3                                | 1.013±0.106 | 0.959±0.044  | 0.972±0.036 | 1.236±0.006* | 1.032±0.168 | 1.395±0.032* |
| NCX                                 | 1.013±0.106 | 0.952±0.052  | 0.972±0.036 | 0.862±0.005* | 1.032±0.168 | 0.681±0.005* |
| <b>endoplasmic reticulum stress</b> |             |              |             |              |             |              |
| XBPI                                | 1.013±0.106 | 1.231±0.001* | 0.972±0.036 | 1.340±0.015* | 1.032±0.168 | 1.443±0.019* |
| LAMP                                | 1.013±0.106 | 1.054±0.057  | 0.972±0.036 | 1.207±0.012* | 1.032±0.168 | 1.236±0.006* |
| GRP78                               | 1.013±0.106 | 1.046±0.058  | 0.972±0.036 | 1.347±0.015* | 1.032±0.168 | 1.644±0.013* |
| GRP94                               | 1.013±0.106 | 1.023±0.009  | 0.972±0.036 | 1.230±0.001* | 1.032±0.168 | 1.532±0.012* |
| CHOP                                | 1.013±0.106 | 1.019±0.011  | 0.972±0.036 | 1.273±0.040* | 1.032±0.168 | 1.447±0.013* |
| ATF4                                | 1.013±0.106 | 1.115±0.012  | 0.972±0.036 | 1.236±0.109* | 1.032±0.168 | 1.318±0.007* |
| ATF6                                | 1.013±0.106 | 1.008±0.085  | 0.972±0.036 | 1.211±0.020* | 1.032±0.168 | 1.347±0.027* |
| <b>inflammation</b>                 |             |              |             |              |             |              |
| PTGES                               | 1.013±0.106 | 1.133±0.001  | 0.972±0.036 | 1.246±0.006* | 1.032±0.168 | 1.436±0.008* |
| HO-1                                | 1.013±0.106 | 0.976±0.001  | 0.972±0.036 | 0.829±0.028* | 1.032±0.168 | 0.554±0.019* |
| iNOS                                | 1.013±0.106 | 1.119±0.016  | 0.972±0.036 | 1.247±0.016* | 1.032±0.168 | 1.342±0.017* |
| NF-κB                               | 1.013±0.106 | 1.135±0.007  | 0.972±0.036 | 1.337±0.010* | 1.032±0.168 | 2.198±0.056* |
| COX-2                               | 1.013±0.106 | 1.101±0.017  | 0.972±0.036 | 1.190±0.050* | 1.032±0.168 | 1.344±0.010* |
| TNF-α                               | 1.013±0.106 | 1.252±0.061* | 0.972±0.036 | 1.336±0.012* | 1.032±0.168 | 1.781±0.010* |
| <b>heat shock proteins</b>          |             |              |             |              |             |              |
| HSP27                               | 1.013±0.106 | 1.099±0.012  | 0.972±0.036 | 1.300±0.117* | 1.032±0.168 | 1.544±0.017* |
| HSP40                               | 1.013±0.106 | 1.088±0.006  | 0.972±0.036 | 1.151±0.050* | 1.032±0.168 | 1.238±0.013* |
| HSP60                               | 1.013±0.106 | 1.333±0.010* | 0.972±0.036 | 1.442±0.013* | 1.032±0.168 | 1.772±0.007* |
| HSP70                               | 1.013±0.106 | 1.222±0.009* | 0.972±0.036 | 1.337±0.021* | 1.032±0.168 | 1.774±0.023* |
| HSP90                               | 1.013±0.106 | 1.025±0.058  | 0.972±0.036 | 1.178±0.042* | 1.032±0.168 | 1.375±0.058* |

myocardial  
contraction

|       |             |             |             |              |             |              |
|-------|-------------|-------------|-------------|--------------|-------------|--------------|
| MYL2  | 1.013±0.106 | 0.984±0.007 | 0.972±0.036 | 0.884±0.013* | 1.032±0.168 | 0.566±0.017* |
| MYL3  | 1.013±0.106 | 0.972±0.007 | 0.972±0.036 | 0.769±0.031* | 1.032±0.168 | 0.618±0.032* |
| TNNT2 | 1.013±0.106 | 0.978±0.010 | 0.972±0.036 | 0.871±0.024* | 1.032±0.168 | 0.768±0.019* |
| TNNC1 | 1.013±0.106 | 0.889±0.010 | 0.972±0.036 | 0.765±0.004* | 1.032±0.168 | 0.708±0.052* |
| MYH11 | 1.013±0.106 | 1.010±0.011 | 0.972±0.036 | 0.886±0.006* | 1.032±0.168 | 0.803±0.007* |
| MYH15 | 1.013±0.106 | 0.903±0.005 | 0.972±0.036 | 0.867±0.010  | 1.032±0.168 | 0.777±0.018* |

---

Values are the mean ± SD (n = 15). \* Indicates significant difference from the corresponding normal ( $P < 0.05$ ). Normal-6 indicates the normal group at 6 days, Normal-8 indicates the normal group at 8 days, Normal-10 indicates the normal group at 10 days; siRNA-6 indicates the knockdown group at 6 days, siRNA-8 indicates the knockdown group at 8 days, siRNA-10 indicates the knockdown group at 10 days in vivo.
