# Supplementary material for: Selenoprotein Gpx3 knockdown induces myocardial damage through Ca2+ leaks in chickens
Source: Royal Society of Chemistry journal article supplement (doi:10.1039/d0mt00027b), 2020-09-02
Supplement: d0mt00027b4.pdf [file d0mt00027b4.pdf]

Table S4. Effects of Gpx3 knockdown on protein levels in cardiomyocytes

|                              | C           | KD           |
|------------------------------|-------------|--------------|
| Gpx3                         | 0.444±0.018 | 0.059±0.009* |
| calcium channel              |             |              |
| CASR                         | 0.671±0.018 | 0.408±0.021* |
| ORAI1                        | 0.695±0.025 | 0.350±0.017* |
| SERCA                        | 1.616±0.081 | 0.615±0.014* |
| CALM                         | 0.873±0.050 | 0.165±0.005* |
| PMCA                         | 1.494±0.053 | 0.973±0.033* |
| NCX                          | 0.943±0.051 | 0.782±0.032* |
| endoplasmic reticulum stress |             |              |
| XBP1                         | 1.237±0.033 | 1.344±0.053* |
| LAMP                         | 1.214±0.038 | 0.863±0.038* |
| GRP78                        | 0.768±0.028 | 1.043±0.042* |
| CHOP                         | 1.982±0.097 | 2.256±0.099* |
| ATF4                         | 1.080±0.049 | 1.382±0.018* |
| inflammation                 |             |              |
| COX-2                        | 0.668±0.015 | 0.915±0.018* |
| HO-1                         | 0.284±0.007 | 0.198±0.001* |
| iNOS                         | 0.601±0.030 | 1.037±0.045* |
| NF-κB                        | 0.701±0.018 | 1.225±0.011* |
| PTGES                        | 0.240±0.009 | 0.417±0.014* |
| TNF-α                        | 0.424±0.019 | 0.516±0.017* |
| heat shock proteins          |             |              |
| HSP60                        | 0.457±0.020 | 0.647±0.012* |
| HSP70                        | 0.681±0.014 | 0.829±0.014* |
| HSP90                        | 0.729±0.004 | 1.039±0.028* |
| myocardial contraction       |             |              |
| MYL2                         | 0.535±0.020 | 0.354±0.013* |
| MYL3                         | 1.802±0.054 | 1.499±0.021* |
| TNNC1                        | 1.777±0.060 | 0.995±0.010* |
| TNNT2                        | 0.379±0.016 | 0.339±0.010* |

Values are the mean ± SD (n = 3). \* Indicates significant difference from the corresponding normal ( $P < 0.05$ ). C indicates the control group, KD indicates the knockdown group in vitro.

Effects of Gpx3 knockdown on protein levels in chicken embryos

|                              | Normal-10   | siRNA-10     |
|------------------------------|-------------|--------------|
| Gpx3                         | 1.199±0.067 | 0.229±0.016* |
| calcium channel              |             |              |
| CASR                         | 1.185±0.056 | 0.323±0.010* |
| ORAI1                        | 1.452±0.006 | 0.847±0.042* |
| SERCA                        | 1.653±0.002 | 0.973±0.007* |
| CALM                         | 1.104±0.014 | 0.622±0.017* |
| PMCA                         | 0.395±0.006 | 0.237±0.021* |
| NCX                          | 1.082±0.046 | 0.262±0.017* |
| endoplasmic reticulum stress |             |              |
| XBP1                         | 0.233±0.010 | 0.988±0.002* |
| LAMP                         | 0.641±0.015 | 0.449±0.015* |
| GRP78                        | 0.318±0.005 | 0.533±0.002* |
| CHOP                         | 0.879±0.001 | 0.940±0.007* |
| ATF4                         | 0.378±0.006 | 0.865±0.001* |
| inflammation                 |             |              |
| COX-2                        | 0.881±0.006 | 1.022±0.001* |
| HO-1                         | 0.251±0.007 | 0.096±0.006* |
| iNOS                         | 0.322±0.001 | 0.466±0.018* |
| NF-κB                        | 0.888±0.010 | 1.125±0.006* |
| PTGES                        | 0.247±0.006 | 0.719±0.012* |
| TNF-α                        | 0.222±0.011 | 0.337±0.007* |
| heat shock proteins          |             |              |
| HSP60                        | 0.492±0.011 | 0.704±0.007* |
| HSP70                        | 0.268±0.011 | 0.578±0.001* |
| HSP90                        | 0.425±0.134 | 0.864±0.007* |
| myocardial contraction       |             |              |
| MYL2                         | 0.336±0.006 | 0.215±0.016* |
| MYL3                         | 0.441±0.012 | 0.330±0.010* |
| TNNC1                        | 0.550±0.006 | 0.214±0.007* |
| TNNT2                        | 0.426±0.005 | 0.235±0.007* |

Values are the mean ± SD (n = 15). \* Indicates significant difference from the corresponding normal ( $P < 0.05$ ). Normal-10 indicates the normal group at 10 days, siRNA-10 indicates the knockdown group at 10 days in vivo.
